# Supplementary material
Source: PubMed Central journal article supplement (PMC5084634)
Supplement: jpga-63-524-s001.pdf [file jpga-63-524-s001.pdf]

**Supplementary Table 1**

| <b>Primer sequences for <i>in situ</i> hybridization</b> |                                                 |
|----------------------------------------------------------|-------------------------------------------------|
| DR xpnpep1-F1ish                                         | CCAAAGATCACGGTGGAGCT                            |
| DR xpnpep1-R1ish                                         | GAATTCATTAACCCTCACTAAAGGGACGAATCGCAGGGTCCGATAA  |
| DR xpnpep2-F1ish                                         | CAAGGCTGTTTTGTGGACCG                            |
| DR xpnpep2-R1ish                                         | GAATTCATTAACCCTCACTAAAGGGAAGGTACTGTCCTCCGGAGTC  |
| DR add1-F1ish                                            | GTCCGGCTGAACTCTGAACA                            |
| DR add1-R1ish                                            | GAATTCATTAACCCTCACTAAAGGGAGAACGGTCAACAACAGCACC  |
| DRadd2-F1ish                                             | AGGCTTTGTTGGTGGGTGAA                            |
| DRadd2-R1ish                                             | GAATTCATTAACCCTCACTAAAGGGATATGGGGGAGGTAGTTGGGG  |
| DRadd3a-F1ish                                            | CGCAGACTTCTTCATGTCCA                            |
| DRadd3a-R1ish                                            | GAATTCATTAACCCTCACTAAAGGGATTCACTGGGGTTTTGTGTTCA |
| DRadd3b-F1ish                                            | ATCTGTGTGGCATGGAGTGG                            |
| DRadd3b-R1ish                                            | GAATTCATTAACCCTCACTAAAGGGAGTCTGCCAGCAGTTGAGACT  |
| <b>MO sequences</b>                                      |                                                 |
| xpnpep1-5'                                               | ACATTGTGTCTGTTGGGAAACAAAC                       |
| xpnpep1-IE3                                              | TCACTCTACAGAGAAGGATACACAC                       |
| add3a-5'                                                 | TCCTGTCTCGGCTCGCCACTCATCT                       |
| add3a-IE3/6                                              | AACGCCTGAAAGAGAATGTGAGTT                        |
| Standard Control                                         | CCTCTTACCTCAGTTACAATTTATA                       |
| <b>Genotyping primer sequences for sa819</b>             |                                                 |
| add3a_sa819F                                             | CCAGGAATTCAAATTGGTAGGA                          |
| add3a_sa819R                                             | CAAGGCTCAGTTTGATGGTG                            |

**Supplementary Table 1. Sequences of *in situ* hybridization primers, morpholinos (MOs) and genotyping primers.** Note that the reverse primers for *in situ* hybridization have a T3 sequence that allows synthesis of riboprobe directly from the PCR product.

## Supplemental Table 2

|              | Expression in <i>add3a</i><br>MO-injected relative<br>to control | Family                  |
|--------------|------------------------------------------------------------------|-------------------------|
| <i>vhnf1</i> | 1.00±0.08                                                        | HNF6 target             |
| <i>her6</i>  | 1.02±0.04                                                        | Jagged/Notch target     |
| <i>ctgf</i>  | 1.04±0.28                                                        | TGFβ/fibrosis target    |
| <i>irf1b</i> | 1.56±0.52                                                        | Interferon-gamma target |

**Supplemental Table 2. Genes with no significant difference in *add3a*-injected larvae.** Quantitative PCR studies of 5 dpf larvae (torsos) with no difference in expression. Shown are primer pairs for *vhnf1* (*hnf1b*, *tcf2*), an HNF6 target, *her6* (Notch target), *ctgf* (a TGFβ target that is also associated with fibrogenesis), and *irf1b* (an interferon-gamma target). Differences are not significant between the *add3a* MO-injected condition and control (Student's t-test).

## Supplemental Figure 1

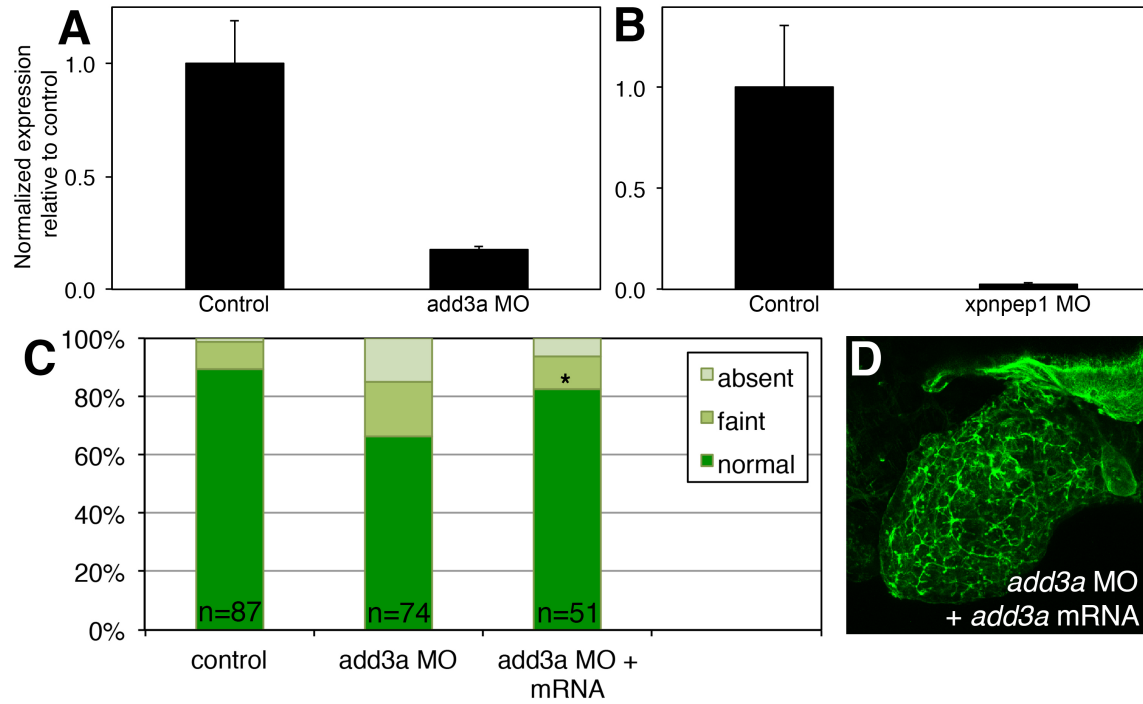

**Documentation of morpholino effect.** (A-B) Quantitative PCR expression of product with 3' primer in deleted exon, showing markedly decreased expression of *add3a* (A) and *xpnpep1* (B). (C) Gallbladder PED-6 uptake from control, *add3a* MO-injected, and *add3a* MO and mRNA-injected larvae, showing statistically significant rescue of the *add3a* MO phenotype by *add3a* mRNA injection. (D) Confocal projection of liver cytokeratin staining of mRNA-rescued 5 dpf larva, showing an essentially normal phenotype. \* $p \leq 0.0001$ , chi square test, MO- + mRNA-injected vs. MO-injected.

## Supplementary Figure 2

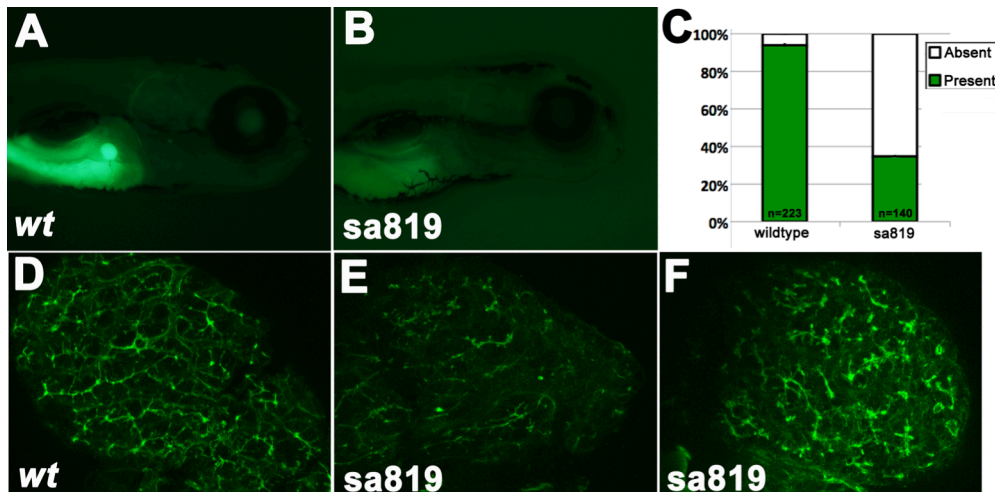

***add3a* deficiency causes defects in biliary function and morphology.** Right lateral views of 5dpf larvae after PED-6 ingestion showing the presence (A) or absence (B) of a gallbladder. (C) Percentages of wildtype siblings and sa819 larvae (\* $p \leq 0.0001$  by chi-square analysis) with present or absent gallbladder visibility, reflecting PED6 uptake and thus biliary function. (D-F) Confocal projections of cytokeratin immunostainings of livers from (D) wild-type or (E,F) sa819 mutants at 5 dpf. Note that the pattern of the intrahepatic ducts from sa819 mutant larvae appears similar to *add3a* MO-injected larvae from the previous figure. Original magnification 400x.
